# Supplementary material
Source: PubMed Central journal article supplement (PMC4534661)
Supplement: IAI.00654-15_zii999091370so1.pdf [file IAI.00654-15_zii999091370so1.pdf]

Supplemental Table 1 Transcriptome analysis of *N. meningitidis* infected to HBMEC

A) Wild type *N. meningitidis* not infected versus infected to HBMEC

| Feature ID     | Gene length | Ratio (B/A) | RNA from bacteria not infected (A) |                  |        | RNA from bacteria infected (B) |                  |        |
|----------------|-------------|-------------|------------------------------------|------------------|--------|--------------------------------|------------------|--------|
|                |             |             | Unique gene reads                  | Total gene reads | RPKM   | Unique gene reads              | Total gene reads | RPKM   |
| <i>NMB0977</i> | 474         | 8.04        | 135                                | 139              | 253.1  | 1103                           | 1135             | 2035.4 |
| <i>mdaB</i>    | 579         | 8.00        | 179                                | 181              | 269.8  | 1442                           | 1471             | 2159.6 |
| <i>rpsQ</i>    | 264         | 7.51        | 70                                 | 70               | 228.8  | 534                            | 534              | 1719.4 |
| <i>rpsK</i>    | 396         | 6.24        | 250                                | 250              | 544.8  | 1585                           | 1585             | 3402.3 |
| <i>rplW</i>    | 315         | 5.88        | 62                                 | 62               | 169.9  | 370                            | 370              | 998.4  |
| <i>rpsH</i>    | 393         | 5.70        | 162                                | 162              | 355.8  | 937                            | 937              | 2026.7 |
| <i>rpsT</i>    | 264         | 5.51        | 437                                | 437              | 1428.6 | 2445                           | 2445             | 7872.4 |
| <i>NMB1858</i> | 387         | 5.15        | 39                                 | 39               | 87.0   | 204                            | 204              | 448.1  |
| <i>rpsS</i>    | 279         | 4.68        | 95                                 | 95               | 293.9  | 451                            | 451              | 1374.1 |
| <i>NMB1236</i> | 279         | 4.66        | 109                                | 109              | 337.2  | 516                            | 516              | 1572.1 |
| <i>rplR</i>    | 354         | 4.45        | 189                                | 189              | 460.8  | 853                            | 853              | 2048.2 |
| <i>NMB0337</i> | 999         | 4.11        | 754                                | 754              | 651.4  | 3150                           | 3150             | 2680.3 |
| <i>rplA</i>    | 696         | 4.00        | 762                                | 762              | 944.9  | 3093                           | 3093             | 3777.5 |
| <i>rpmI</i>    | 198         | 3.94        | 23                                 | 23               | 100.3  | 92                             | 92               | 395.0  |
| <i>NMB0651</i> | 390         | 3.62        | 14                                 | 50               | 110.6  | 34                             | 184              | 401.0  |
| <i>NMB1305</i> | 828         | 3.50        | 94                                 | 94               | 98.0   | 334                            | 334              | 342.9  |
| <i>rpsM</i>    | 363         | 3.41        | 337                                | 337              | 801.2  | 1167                           | 1167             | 2732.7 |
| <i>NMB1304</i> | 1137        | 3.41        | 338                                | 338              | 256.6  | 1170                           | 1170             | 874.7  |
| <i>rplO</i>    | 435         | 3.40        | 427                                | 427              | 847.2  | 1476                           | 1476             | 2884.2 |
| <i>NMB1575</i> | 294         | 3.20        | 48                                 | 48               | 140.9  | 156                            | 156              | 451.0  |
| <i>rplQ</i>    | 369         | 3.16        | 329                                | 329              | 769.5  | 1054                           | 1054             | 2428.0 |
| <i>rplK</i>    | 435         | 3.10        | 424                                | 424              | 841.2  | 1336                           | 1336             | 2610.7 |
| <i>rpsE</i>    | 519         | 3.01        | 721                                | 721              | 1198.9 | 2204                           | 2204             | 3609.7 |
| <i>rplF</i>    | 534         | 2.96        | 545                                | 545              | 880.8  | 1638                           | 1638             | 2607.4 |

|                |      |      |      |      |        |      |      |         |
|----------------|------|------|------|------|--------|------|------|---------|
| <i>rpsR</i>    | 231  | 2.95 | 54   | 54   | 201.7  | 162  | 162  | 596.1   |
| <i>NMB2095</i> | 375  | 2.94 | 1693 | 1693 | 3896.3 | 5048 | 5048 | 11442.5 |
| <i>NMB1343</i> | 438  | 2.89 | 49   | 49   | 96.5   | 144  | 144  | 279.5   |
| <i>hfq</i>     | 294  | 2.83 | 165  | 165  | 484.4  | 474  | 474  | 1370.5  |
| <i>rpmA</i>    | 273  | 2.81 | 587  | 587  | 1855.7 | 1672 | 1672 | 5206.0  |
| <i>rpsD</i>    | 621  | 2.78 | 991  | 991  | 1377.2 | 2793 | 2793 | 3823.1  |
| <i>NMB0057</i> | 357  | 2.72 | 41   | 50   | 120.9  | 126  | 138  | 328.6   |
| <i>secY</i>    | 1311 | 2.67 | 823  | 823  | 541.8  | 2234 | 2234 | 1448.5  |
| <i>aroG</i>    | 1056 | 2.67 | 541  | 541  | 442.1  | 1466 | 1466 | 1180.1  |
| <i>NMB1474</i> | 210  | 2.63 | 15   | 15   | 61.6   | 40   | 40   | 161.9   |
| <i>NMB0398</i> | 282  | 2.59 | 19   | 19   | 58.1   | 50   | 50   | 150.7   |
| <i>NMB0650</i> | 420  | 2.57 | 39   | 139  | 285.6  | 74   | 362  | 732.6   |
| <i>NMB0311</i> | 246  | 2.56 | 99   | 99   | 347.3  | 257  | 257  | 888.0   |
| <i>rpsC</i>    | 693  | 2.52 | 1481 | 1481 | 1844.4 | 3783 | 3783 | 4640.2  |
| <i>NMB0615</i> | 1305 | 2.46 | 833  | 833  | 550.9  | 2083 | 2083 | 1356.8  |
| <i>rplJ</i>    | 501  | 2.41 | 1386 | 1386 | 2387.5 | 3385 | 3385 | 5743.2  |
| <i>NMB0649</i> | 225  | 2.39 | 33   | 33   | 126.6  | 80   | 80   | 302.2   |
| <i>rplV</i>    | 330  | 2.37 | 351  | 351  | 917.9  | 844  | 844  | 2174.0  |
| <i>NMB1322</i> | 303  | 2.32 | 209  | 209  | 595.3  | 492  | 492  | 1380.2  |
| <i>rpsP</i>    | 246  | 2.32 | 408  | 408  | 1431.4 | 959  | 959  | 3313.7  |
| <i>NMB0791</i> | 510  | 2.27 | 1118 | 1118 | 1891.9 | 2581 | 2581 | 4301.8  |
| <i>rplT</i>    | 360  | 2.23 | 1078 | 1078 | 2584.3 | 2437 | 2437 | 5754.2  |
| <i>NMB1468</i> | 324  | 2.20 | 829  | 829  | 2208.2 | 1855 | 1855 | 4866.7  |
| <i>mtrC</i>    | 1239 | 2.20 | 1702 | 1702 | 1185.5 | 3799 | 3799 | 2606.3  |
| <i>rpoA</i>    | 987  | 2.17 | 2235 | 2235 | 1954.3 | 4921 | 4921 | 4238.1  |
| <i>NMB1426</i> | 1254 | 2.16 | 477  | 477  | 328.3  | 1048 | 1048 | 710.4   |
| <i>NMB1380</i> | 387  | 2.16 | 187  | 187  | 417.0  | 410  | 410  | 900.5   |
| <i>icd</i>     | 2226 | 2.15 | 2540 | 2540 | 984.8  | 5553 | 5553 | 2120.5  |
| <i>NMB1592</i> | 489  | 2.15 | 315  | 315  | 555.9  | 688  | 688  | 1195.9  |
| <i>NMB0890</i> | 489  | 2.14 | 120  | 120  | 211.8  | 261  | 261  | 453.7   |
| <i>bfrB</i>    | 474  | 2.13 | 69   | 69   | 125.6  | 149  | 149  | 267.2   |

|                |      |       |      |      |        |      |      |        |
|----------------|------|-------|------|------|--------|------|------|--------|
| <i>NMB1056</i> | 213  | 2.11  | 14   | 14   | 56.7   | 30   | 30   | 119.7  |
| <i>rpsJ</i>    | 312  | 2.11  | 901  | 901  | 2492.3 | 1927 | 1927 | 5250.0 |
| <i>NMB0404</i> | 321  | 2.10  | 106  | 106  | 285.0  | 226  | 226  | 598.5  |
| <i>NMB2078</i> | 582  | 2.10  | 994  | 994  | 1474.0 | 2119 | 2119 | 3094.9 |
| <i>NMB1369</i> | 555  | 2.09  | 343  | 343  | 533.4  | 729  | 729  | 1116.5 |
| <i>NMB1368</i> | 1389 | 2.07  | 1674 | 1674 | 1040.1 | 3514 | 3514 | 2150.5 |
| <i>NMB1048</i> | 1470 | 2.07  | 361  | 361  | 211.9  | 757  | 757  | 437.7  |
| <i>NMB1580</i> | 900  | 2.06  | 189  | 189  | 181.2  | 396  | 396  | 374.0  |
| <i>dnaK</i>    | 1929 | 2.06  | 4728 | 4728 | 2115.3 | 9869 | 9869 | 4348.8 |
| <i>ilvI</i>    | 1728 | 2.03  | 1913 | 1913 | 955.4  | 3944 | 3944 | 1940.1 |
| <i>NMB1986</i> | 432  | 2.03  | 156  | 156  | 311.6  | 321  | 321  | 631.6  |
| <i>NMB1381</i> | 381  | 2.01  | 183  | 183  | 414.5  | 373  | 373  | 832.2  |
| <i>mapA</i>    | 2259 | -2.00 | 2662 | 2662 | 1017.0 | 1351 | 1351 | 508.4  |
| <i>NMB0581</i> | 1662 | -2.00 | 603  | 603  | 313.1  | 306  | 306  | 156.5  |
| <i>lipB</i>    | 1260 | -2.00 | 381  | 381  | 261.0  | 193  | 193  | 130.2  |
| <i>NMB0213</i> | 987  | -2.01 | 316  | 316  | 276.3  | 160  | 160  | 137.8  |
| <i>avtA</i>    | 1293 | -2.02 | 524  | 524  | 349.7  | 264  | 264  | 173.6  |
| <i>fumC</i>    | 1389 | -2.02 | 1908 | 1908 | 1185.5 | 961  | 961  | 588.1  |
| <i>NMB0599</i> | 771  | -2.02 | 227  | 227  | 254.1  | 114  | 114  | 125.7  |
| <i>nqrE</i>    | 594  | -2.02 | 235  | 235  | 341.4  | 118  | 118  | 168.9  |
| <i>NMB1590</i> | 336  | -2.03 | 555  | 555  | 1425.5 | 278  | 278  | 703.3  |
| <i>NMB2043</i> | 972  | -2.03 | 50   | 50   | 44.4   | 21   | 25   | 21.9   |
| <i>NMB1125</i> | 372  | -2.03 | 0    | 144  | 334.1  | 0    | 72   | 164.5  |
| <i>pilB</i>    | 1569 | -2.04 | 732  | 732  | 402.6  | 365  | 365  | 197.7  |
| <i>NMB1459</i> | 924  | -2.04 | 297  | 297  | 277.4  | 148  | 148  | 136.2  |
| <i>uvrD</i>    | 2208 | -2.04 | 843  | 843  | 329.5  | 420  | 420  | 161.7  |
| <i>NMB0012</i> | 972  | -2.04 | 398  | 398  | 353.4  | 198  | 198  | 173.2  |
| <i>NMB0208</i> | 840  | -2.04 | 284  | 284  | 291.8  | 141  | 141  | 142.7  |
| <i>NMB0317</i> | 474  | -2.05 | 131  | 131  | 238.5  | 65   | 65   | 116.6  |
| <i>NMB1413</i> | 587  | -2.05 | 35   | 105  | 154.4  | 24   | 52   | 75.3   |
| <i>nuoD</i>    | 1257 | -2.05 | 505  | 505  | 346.7  | 250  | 250  | 169.1  |

|                |      |       |      |      |       |     |     |       |
|----------------|------|-------|------|------|-------|-----|-----|-------|
| <i>dinG</i>    | 2151 | -2.05 | 887  | 887  | 355.9 | 439 | 439 | 173.5 |
| <i>NMB1551</i> | 1104 | -2.05 | 0    | 95   | 74.3  | 0   | 47  | 36.2  |
| <i>NMB0587</i> | 876  | -2.05 | 283  | 283  | 278.8 | 140 | 140 | 135.8 |
| <i>NMB0588</i> | 756  | -2.05 | 261  | 261  | 297.9 | 129 | 129 | 145.0 |
| <i>recQ</i>    | 2301 | -2.06 | 954  | 954  | 357.8 | 471 | 471 | 174.0 |
| <i>mutS</i>    | 2595 | -2.06 | 1159 | 1159 | 385.5 | 572 | 572 | 187.4 |
| <i>NMB0314</i> | 969  | -2.06 | 449  | 449  | 399.9 | 221 | 221 | 193.9 |
| <i>hemL</i>    | 1284 | -2.07 | 714  | 714  | 479.9 | 351 | 351 | 232.4 |
| <i>NMB0050</i> | 2151 | -2.07 | 767  | 767  | 307.7 | 377 | 377 | 149.0 |
| <i>NMB0276</i> | 957  | -2.07 | 401  | 401  | 361.6 | 197 | 197 | 175.0 |
| <i>NMB0541</i> | 498  | -2.07 | 110  | 110  | 190.6 | 54  | 54  | 92.2  |
| <i>NMB1352</i> | 435  | -2.07 | 53   | 53   | 105.2 | 26  | 26  | 50.8  |
| <i>NMB1348</i> | 816  | -2.07 | 259  | 259  | 273.9 | 127 | 127 | 132.3 |
| <i>NMB0255</i> | 576  | -2.07 | 102  | 102  | 152.8 | 50  | 50  | 73.8  |
| <i>pyrH</i>    | 720  | -2.07 | 402  | 402  | 481.9 | 197 | 197 | 232.6 |
| <i>NMB1418</i> | 870  | -2.07 | 192  | 192  | 190.5 | 94  | 94  | 91.8  |
| <i>NMB1042</i> | 2472 | -2.07 | 711  | 711  | 248.2 | 348 | 348 | 119.7 |
| <i>NMB0530</i> | 1086 | -2.08 | 481  | 481  | 382.2 | 235 | 235 | 183.9 |
| <i>xerC</i>    | 906  | -2.08 | 199  | 199  | 189.6 | 97  | 97  | 91.0  |
| <i>NMB0636</i> | 384  | -2.09 | 109  | 109  | 245.0 | 53  | 53  | 117.3 |
| <i>recX</i>    | 462  | -2.09 | 72   | 72   | 134.5 | 35  | 35  | 64.4  |
| <i>NMB1736</i> | 812  | -2.09 | 105  | 105  | 111.6 | 51  | 51  | 53.4  |
| <i>orn</i>     | 564  | -2.09 | 208  | 208  | 318.3 | 101 | 101 | 152.2 |
| <i>NMB1770</i> | 966  | -2.09 | 0    | 33   | 29.5  | 0   | 16  | 14.1  |
| <i>mtgA</i>    | 702  | -2.10 | 223  | 223  | 274.2 | 108 | 108 | 130.8 |
| <i>NMB1711</i> | 780  | -2.10 | 273  | 273  | 302.1 | 132 | 132 | 143.9 |
| <i>NMB2130</i> | 243  | -2.10 | 29   | 29   | 103.0 | 14  | 14  | 49.0  |
| <i>NMB0108</i> | 666  | -2.11 | 293  | 293  | 379.7 | 141 | 141 | 180.0 |
| <i>pgi</i>     | 1644 | -2.11 | 641  | 641  | 336.5 | 308 | 308 | 159.3 |
| <i>NMB1166</i> | 1314 | -2.11 | 0    | 302  | 198.4 | 0   | 145 | 93.8  |
| <i>NMB0984</i> | 944  | -2.12 | 23   | 25   | 22.9  | 12  | 12  | 10.8  |

|                |      |       |      |      |        |      |      |        |
|----------------|------|-------|------|------|--------|------|------|--------|
| <i>NMB0621</i> | 828  | -2.12 | 192  | 192  | 200.1  | 92   | 92   | 94.4   |
| <i>folK</i>    | 495  | -2.13 | 65   | 65   | 113.3  | 31   | 31   | 53.2   |
| <i>NMB0911</i> | 966  | -2.13 | 3    | 21   | 18.8   | 1    | 10   | 8.8    |
| <i>pgsA</i>    | 564  | -2.13 | 84   | 84   | 128.5  | 40   | 40   | 60.3   |
| <i>putA</i>    | 3606 | -2.13 | 1902 | 1902 | 455.2  | 905  | 905  | 213.3  |
| <i>fabD</i>    | 927  | -2.14 | 1456 | 1456 | 1355.5 | 691  | 691  | 633.6  |
| <i>NMB1923</i> | 384  | -2.14 | 38   | 38   | 85.4   | 18   | 18   | 39.8   |
| <i>miaA</i>    | 942  | -2.15 | 260  | 260  | 238.2  | 123  | 123  | 111.0  |
| <i>metK</i>    | 1170 | -2.15 | 676  | 676  | 498.6  | 319  | 319  | 231.8  |
| <i>NMB0104</i> | 675  | -2.15 | 106  | 106  | 135.5  | 50   | 50   | 63.0   |
| <i>tbp2</i>    | 2139 | -2.16 | 385  | 385  | 155.3  | 181  | 181  | 71.9   |
| <i>gltS</i>    | 1215 | -2.16 | 694  | 694  | 493.0  | 326  | 326  | 228.1  |
| <i>nuoA</i>    | 357  | -2.16 | 49   | 49   | 118.5  | 23   | 23   | 54.8   |
| <i>NMB1779</i> | 5988 | -2.17 | 120  | 917  | 132.2  | 68   | 430  | 61.0   |
| <i>fabF-I</i>  | 1248 | -2.17 | 3178 | 3178 | 2197.7 | 1490 | 1490 | 1014.9 |
| <i>nuoF</i>    | 1302 | -2.17 | 493  | 493  | 326.8  | 231  | 231  | 150.8  |
| <i>NMB1877</i> | 2016 | -2.17 | 570  | 570  | 244.0  | 267  | 267  | 112.6  |
| <i>NMB1444</i> | 336  | -2.17 | 186  | 186  | 477.7  | 87   | 87   | 220.1  |
| <i>NMB2055</i> | 930  | -2.17 | 263  | 263  | 244.1  | 123  | 123  | 112.4  |
| <i>NMB0665</i> | 1176 | -2.17 | 349  | 349  | 256.1  | 163  | 163  | 117.8  |
| <i>NMB2098</i> | 591  | -2.17 | 182  | 182  | 265.8  | 85   | 85   | 122.3  |
| <i>NMB0285</i> | 1870 | -2.18 | 521  | 521  | 240.4  | 243  | 243  | 110.5  |
| <i>ppnK</i>    | 891  | -2.18 | 296  | 296  | 286.7  | 138  | 138  | 131.7  |
| <i>dedA</i>    | 645  | -2.18 | 157  | 157  | 210.1  | 73   | 73   | 96.2   |
| <i>NMB0867</i> | 924  | -2.19 | 194  | 194  | 181.2  | 90   | 90   | 82.8   |
| <i>NMB2007</i> | 1392 | -2.19 | 414  | 414  | 256.7  | 192  | 192  | 117.2  |
| <i>lnt</i>     | 1575 | -2.19 | 468  | 468  | 256.4  | 217  | 217  | 117.1  |
| <i>NMB1713</i> | 966  | -2.19 | 0    | 82   | 73.3   | 0    | 38   | 33.4   |
| <i>NMB0746</i> | 375  | -2.20 | 65   | 65   | 149.6  | 30   | 30   | 68.0   |
| <i>NMB1359</i> | 1011 | -2.20 | 273  | 273  | 233.0  | 126  | 126  | 105.9  |
| <i>nuoI</i>    | 480  | -2.20 | 115  | 115  | 206.8  | 53   | 53   | 93.9   |

|                |      |       |      |      |        |     |     |       |
|----------------|------|-------|------|------|--------|-----|-----|-------|
| <i>NMB0995</i> | 684  | -2.21 | 157  | 157  | 198.1  | 72  | 72  | 89.5  |
| <i>hitA</i>    | 324  | -2.22 | 166  | 166  | 442.2  | 76  | 76  | 199.4 |
| <i>NMB2024</i> | 606  | -2.23 | 274  | 274  | 390.2  | 125 | 125 | 175.3 |
| <i>cysD-1</i>  | 924  | -2.23 | 0    | 101  | 94.3   | 0   | 46  | 42.3  |
| <i>fbpC</i>    | 1059 | -2.23 | 547  | 547  | 445.8  | 249 | 249 | 199.9 |
| <i>rfaA-2</i>  | 867  | -2.23 | 0    | 233  | 231.9  | 0   | 106 | 103.9 |
| <i>NMB1908</i> | 726  | -2.23 | 231  | 231  | 274.6  | 105 | 105 | 122.9 |
| <i>accC</i>    | 1362 | -2.25 | 1974 | 1974 | 1250.8 | 892 | 892 | 556.7 |
| <i>mtr</i>     | 1242 | -2.25 | 363  | 363  | 252.2  | 164 | 164 | 112.2 |
| <i>NMB1836</i> | 1872 | -2.25 | 457  | 457  | 210.7  | 206 | 206 | 93.5  |
| <i>NMB1960</i> | 483  | -2.26 | 842  | 842  | 1504.5 | 379 | 379 | 667.0 |
| <i>NMB0598</i> | 609  | -2.26 | 225  | 225  | 318.9  | 101 | 101 | 141.0 |
| <i>nuoG</i>    | 2262 | -2.26 | 1032 | 1032 | 393.7  | 463 | 463 | 174.0 |
| <i>NMB1961</i> | 828  | -2.27 | 843  | 843  | 878.7  | 377 | 377 | 387.0 |
| <i>lpxB</i>    | 1173 | -2.27 | 481  | 481  | 353.9  | 215 | 215 | 155.8 |
| <i>murF</i>    | 1368 | -2.27 | 665  | 665  | 419.5  | 297 | 297 | 184.5 |
| <i>mgtE</i>    | 1455 | -2.28 | 567  | 567  | 336.3  | 253 | 253 | 147.8 |
| <i>NMB1815</i> | 843  | -2.28 | 348  | 348  | 356.3  | 155 | 155 | 156.3 |
| <i>radA</i>    | 1380 | -2.28 | 443  | 443  | 277.0  | 197 | 197 | 121.3 |
| <i>NMB2006</i> | 1410 | -2.28 | 623  | 623  | 381.3  | 277 | 277 | 167.0 |
| <i>NMB0593</i> | 2427 | -2.28 | 749  | 749  | 266.3  | 333 | 333 | 116.6 |
| <i>NMB1782</i> | 303  | -2.28 | 27   | 27   | 76.9   | 12  | 12  | 33.7  |
| <i>NMB0293</i> | 2112 | -2.29 | 602  | 602  | 246.0  | 267 | 267 | 107.5 |
| <i>NMB0583</i> | 669  | -2.29 | 135  | 149  | 192.2  | 63  | 66  | 83.9  |
| <i>mafA-2</i>  | 942  | -2.29 | 0    | 217  | 198.8  | 0   | 96  | 86.6  |
| <i>nuoK</i>    | 306  | -2.30 | 68   | 68   | 191.8  | 30  | 30  | 83.3  |
| <i>NMB0855</i> | 657  | -2.30 | 34   | 34   | 44.7   | 15  | 15  | 19.4  |
| <i>NMB1917</i> | 408  | -2.30 | 68   | 68   | 143.8  | 30  | 30  | 62.5  |
| <i>NMB1553</i> | 318  | -2.31 | 44   | 50   | 135.7  | 20  | 22  | 58.8  |
| <i>NMB1227</i> | 396  | -2.31 | 50   | 50   | 109.0  | 22  | 22  | 47.2  |
| <i>NMB1783</i> | 1225 | -2.31 | 123  | 123  | 86.7   | 54  | 54  | 37.5  |

|                |      |       |      |      |       |     |     |       |
|----------------|------|-------|------|------|-------|-----|-----|-------|
| <i>cysD-2</i>  | 924  | -2.32 | 0    | 89   | 83.1  | 0   | 39  | 35.9  |
| <i>gntP</i>    | 1386 | -2.32 | 493  | 493  | 307.0 | 216 | 216 | 132.5 |
| <i>NMB1984</i> | 1112 | -2.32 | 198  | 206  | 159.9 | 82  | 90  | 68.8  |
| <i>NMB2147</i> | 423  | -2.33 | 71   | 71   | 144.9 | 31  | 31  | 62.3  |
| <i>nuoH</i>    | 1077 | -2.33 | 360  | 360  | 288.5 | 157 | 157 | 123.9 |
| <i>NMB1525</i> | 2033 | -2.33 | 117  | 117  | 49.7  | 51  | 51  | 21.3  |
| <i>NMB1280</i> | 1428 | -2.33 | 941  | 941  | 568.7 | 410 | 410 | 244.1 |
| <i>NMB0247</i> | 438  | -2.34 | 46   | 46   | 90.6  | 20  | 20  | 38.8  |
| <i>NMB1275</i> | 1445 | -2.34 | 352  | 352  | 210.2 | 153 | 153 | 90.0  |
| <i>NMB1568</i> | 441  | -2.34 | 283  | 283  | 553.8 | 123 | 123 | 237.1 |
| <i>NMB1872</i> | 441  | -2.34 | 129  | 129  | 252.5 | 56  | 56  | 107.9 |
| <i>NMB1452</i> | 1140 | -2.35 | 1003 | 1003 | 759.3 | 434 | 434 | 323.6 |
| <i>hsdM</i>    | 1545 | -2.35 | 361  | 361  | 201.7 | 156 | 156 | 85.8  |
| <i>NMB1608</i> | 753  | -2.36 | 172  | 172  | 197.1 | 74  | 74  | 83.5  |
| <i>NMB0544</i> | 723  | -2.36 | 179  | 179  | 213.7 | 77  | 77  | 90.5  |
| <i>NMB0985</i> | 498  | -2.36 | 177  | 177  | 306.7 | 76  | 76  | 129.7 |
| <i>NMB1163</i> | 372  | -2.37 | 0    | 147  | 341.0 | 0   | 63  | 144.0 |
| <i>dnaX</i>    | 2115 | -2.37 | 698  | 698  | 284.8 | 299 | 299 | 120.2 |
| <i>dinP</i>    | 957  | -2.38 | 293  | 293  | 264.2 | 125 | 125 | 111.0 |
| <i>NMB2111</i> | 846  | -2.38 | 60   | 61   | 62.2  | 25  | 26  | 26.1  |
| <i>NMB1524</i> | 1368 | -2.39 | 355  | 355  | 224.0 | 151 | 151 | 93.8  |
| <i>dnaQ-1</i>  | 1413 | -2.39 | 400  | 400  | 244.3 | 170 | 170 | 102.3 |
| <i>rfaA-1</i>  | 867  | -2.39 | 0    | 292  | 290.7 | 0   | 124 | 121.6 |
| <i>recB</i>    | 3615 | -2.39 | 1103 | 1103 | 263.3 | 468 | 468 | 110.0 |
| <i>NMB0269</i> | 726  | -2.40 | 151  | 151  | 179.5 | 64  | 64  | 74.9  |
| <i>pheS</i>    | 993  | -2.40 | 361  | 361  | 313.7 | 153 | 153 | 131.0 |
| <i>ppk</i>     | 2151 | -2.40 | 1121 | 1121 | 449.8 | 474 | 474 | 187.3 |
| <i>NMB0527</i> | 423  | -2.40 | 90   | 90   | 183.6 | 38  | 38  | 76.4  |
| <i>potD-1</i>  | 1380 | -2.41 | 1463 | 1463 | 914.9 | 617 | 617 | 380.0 |
| <i>lgtF</i>    | 759  | -2.42 | 138  | 138  | 156.9 | 58  | 58  | 65.0  |
| <i>NMB1517</i> | 300  | -2.42 | 74   | 74   | 212.9 | 31  | 31  | 87.8  |

|                |      |       |      |      |       |     |     |       |
|----------------|------|-------|------|------|-------|-----|-----|-------|
| <i>NMB1395</i> | 1041 | -2.43 | 172  | 172  | 142.6 | 72  | 72  | 58.8  |
| <i>NMB0434</i> | 1170 | -2.43 | 270  | 270  | 199.2 | 113 | 113 | 82.1  |
| <i>nuoC</i>    | 594  | -2.44 | 144  | 144  | 209.2 | 60  | 60  | 85.9  |
| <i>NMB0378</i> | 1575 | -2.45 | 1603 | 1603 | 878.4 | 664 | 664 | 358.4 |
| <i>NMB2133</i> | 1230 | -2.45 | 457  | 457  | 320.7 | 189 | 189 | 130.6 |
| <i>NMB0395</i> | 939  | -2.47 | 282  | 282  | 259.2 | 116 | 116 | 105.0 |
| <i>pglB</i>    | 1242 | -2.47 | 275  | 275  | 191.1 | 113 | 113 | 77.3  |
| <i>lipA</i>    | 2115 | -2.48 | 779  | 779  | 317.9 | 319 | 319 | 128.2 |
| <i>cysN-2</i>  | 1287 | -2.50 | 0    | 143  | 95.9  | 0   | 58  | 38.3  |
| <i>NMB0088</i> | 1401 | -2.51 | 909  | 909  | 560.0 | 368 | 368 | 223.3 |
| <i>NMB0882</i> | 333  | -2.51 | 99   | 99   | 256.6 | 40  | 40  | 102.1 |
| <i>nuoB</i>    | 483  | -2.52 | 119  | 119  | 212.6 | 48  | 48  | 84.5  |
| <i>NMB0036</i> | 1266 | -2.52 | 1121 | 1121 | 764.2 | 451 | 451 | 302.8 |
| <i>NMB0653</i> | 1269 | -2.53 | 119  | 388  | 263.9 | 69  | 156 | 104.5 |
| <i>NMB1273</i> | 1437 | -2.53 | 388  | 388  | 233.0 | 156 | 156 | 92.3  |
| <i>NMB1346</i> | 1778 | -2.53 | 316  | 316  | 153.4 | 127 | 127 | 60.7  |
| <i>NMB1279</i> | 1110 | -2.53 | 625  | 625  | 485.9 | 251 | 251 | 192.2 |
| <i>NMB1507</i> | 360  | -2.54 | 75   | 75   | 179.8 | 30  | 30  | 70.8  |
| <i>NMB0474</i> | 783  | -2.56 | 111  | 111  | 122.3 | 44  | 44  | 47.8  |
| <i>NMB1299</i> | 1367 | -2.58 | 203  | 203  | 128.2 | 80  | 80  | 49.7  |
| <i>NMB0024</i> | 597  | -2.58 | 66   | 66   | 95.4  | 26  | 26  | 37.0  |
| <i>gapA-1</i>  | 1032 | -2.59 | 431  | 431  | 360.4 | 169 | 169 | 139.2 |
| <i>NMB0316</i> | 687  | -2.59 | 207  | 207  | 260.0 | 81  | 81  | 100.2 |
| <i>NMB0846</i> | 1035 | -2.60 | 200  | 200  | 166.8 | 78  | 78  | 64.1  |
| <i>NMB2150</i> | 570  | -2.60 | 159  | 159  | 240.7 | 62  | 62  | 92.5  |
| <i>NMB1508</i> | 1458 | -2.61 | 539  | 539  | 319.0 | 210 | 210 | 122.4 |
| <i>NMB0964</i> | 2277 | -2.61 | 1709 | 1709 | 647.7 | 665 | 665 | 248.3 |
| <i>NMB0222</i> | 474  | -2.61 | 54   | 54   | 98.3  | 21  | 21  | 37.7  |
| <i>NMB0234</i> | 540  | -2.61 | 103  | 103  | 164.6 | 40  | 40  | 63.0  |
| <i>NMB0596</i> | 1815 | -2.63 | 786  | 786  | 373.7 | 303 | 303 | 141.9 |
| <i>NMB1202</i> | 462  | -2.64 | 26   | 26   | 48.6  | 10  | 10  | 18.4  |



|                |      |       |      |      |        |     |     |       |
|----------------|------|-------|------|------|--------|-----|-----|-------|
| <i>cysT</i>    | 837  | -2.65 | 180  | 180  | 185.6  | 69  | 69  | 70.1  |
| <i>NMB2034</i> | 744  | -2.65 | 251  | 251  | 291.2  | 96  | 96  | 109.7 |
| <i>NMB1414</i> | 774  | -2.67 | 17   | 21   | 23.4   | 6   | 8   | 8.8   |
| <i>ackA-I</i>  | 1200 | -2.68 | 322  | 322  | 231.6  | 122 | 122 | 86.4  |
| <i>lbpB</i>    | 2214 | -2.68 | 103  | 103  | 40.1   | 39  | 39  | 15.0  |
| <i>NMB1077</i> | 552  | -2.69 | 82   | 82   | 128.2  | 31  | 31  | 47.7  |
| <i>NMB1018</i> | 483  | -2.71 | 80   | 80   | 142.9  | 30  | 30  | 52.8  |
| <i>NMB0701</i> | 255  | -2.71 | 24   | 24   | 81.2   | 9   | 9   | 30.0  |
| <i>NMB0032</i> | 528  | -2.71 | 128  | 128  | 209.2  | 48  | 48  | 77.3  |
| <i>NMB1871</i> | 678  | -2.72 | 249  | 249  | 317.0  | 93  | 93  | 116.6 |
| <i>nadC</i>    | 882  | -2.72 | 284  | 284  | 277.9  | 106 | 106 | 102.2 |
| <i>parC</i>    | 2304 | -2.72 | 799  | 799  | 299.3  | 298 | 298 | 109.9 |
| <i>NMB0744</i> | 480  | -2.73 | 604  | 604  | 1086.0 | 225 | 225 | 398.4 |
| <i>priA</i>    | 2190 | -2.73 | 605  | 605  | 238.4  | 225 | 225 | 87.3  |
| <i>cysH-I</i>  | 741  | -2.73 | 0    | 35   | 40.8   | 0   | 13  | 14.9  |
| <i>NMB0034</i> | 840  | -2.75 | 590  | 590  | 606.2  | 218 | 218 | 220.6 |
| <i>NMB1699</i> | 366  | -2.77 | 60   | 60   | 141.5  | 22  | 22  | 51.1  |
| <i>NMB1992</i> | 627  | -2.77 | 142  | 142  | 195.5  | 52  | 52  | 70.5  |
| <i>mafA-I</i>  | 942  | -2.78 | 0    | 271  | 248.3  | 0   | 99  | 89.3  |
| <i>mtrF</i>    | 1569 | -2.78 | 307  | 307  | 168.9  | 112 | 112 | 60.7  |
| <i>NMB1993</i> | 759  | -2.79 | 184  | 184  | 209.2  | 67  | 67  | 75.0  |
| <i>NMB0432</i> | 789  | -2.80 | 174  | 174  | 190.3  | 63  | 63  | 67.9  |
| <i>NMB1386</i> | 456  | -2.81 | 36   | 36   | 68.1   | 13  | 13  | 24.2  |
| <i>dadA</i>    | 1257 | -2.81 | 385  | 385  | 264.3  | 139 | 139 | 94.0  |
| <i>NMB0741</i> | 1440 | -2.82 | 330  | 330  | 197.8  | 119 | 119 | 70.2  |
| <i>NMB1475</i> | 807  | -2.82 | 1310 | 1310 | 1400.9 | 471 | 471 | 496.1 |
| <i>NMB0263</i> | 924  | -2.83 | 298  | 298  | 278.3  | 107 | 107 | 98.4  |
| <i>NMB0582</i> | 543  | -2.84 | 123  | 123  | 195.5  | 44  | 44  | 68.9  |
| <i>NMB1464</i> | 492  | -2.84 | 151  | 151  | 264.9  | 54  | 54  | 93.3  |
| <i>vapA</i>    | 2092 | -2.84 | 445  | 445  | 183.6  | 159 | 159 | 64.6  |
| <i>NMB0201</i> | 411  | -2.84 | 28   | 28   | 58.8   | 10  | 10  | 20.7  |

|                |      |       |      |      |        |      |      |       |
|----------------|------|-------|------|------|--------|------|------|-------|
| <i>mutY</i>    | 1050 | -2.86 | 166  | 166  | 136.4  | 59   | 59   | 47.8  |
| <i>pglD</i>    | 1911 | -2.86 | 533  | 533  | 240.7  | 189  | 189  | 84.1  |
| <i>NMB1327</i> | 1404 | -2.87 | 266  | 266  | 163.5  | 94   | 94   | 56.9  |
| <i>NMB0826</i> | 1236 | -2.89 | 168  | 168  | 117.3  | 59   | 59   | 40.6  |
| <i>NMB0078</i> | 657  | -2.89 | 22   | 57   | 74.9   | 9    | 20   | 25.9  |
| <i>NMB1606</i> | 1518 | -2.90 | 420  | 420  | 238.8  | 147  | 147  | 82.3  |
| <i>cysJ-1</i>  | 1815 | -2.91 | 0    | 149  | 70.8   | 0    | 52   | 24.4  |
| <i>NMB2132</i> | 1467 | -2.91 | 238  | 238  | 140.0  | 83   | 83   | 48.1  |
| <i>NMB1122</i> | 1144 | -2.91 | 218  | 218  | 164.5  | 76   | 76   | 56.5  |
| <i>cysI-2</i>  | 1770 | -2.92 | 0    | 207  | 100.9  | 0    | 72   | 34.6  |
| <i>ribD</i>    | 1110 | -2.92 | 460  | 460  | 357.7  | 160  | 160  | 122.5 |
| <i>acnA</i>    | 2607 | -2.93 | 767  | 767  | 253.9  | 266  | 266  | 86.7  |
| <i>NMB0497</i> | 5937 | -2.93 | 115  | 866  | 125.9  | 50   | 300  | 43.0  |
| <i>NMB1000</i> | 1018 | -2.93 | 171  | 179  | 151.8  | 60   | 62   | 51.8  |
| <i>NMB0994</i> | 1092 | -2.93 | 286  | 286  | 226.0  | 99   | 99   | 77.1  |
| <i>NMB1989</i> | 966  | -2.94 | 258  | 258  | 230.5  | 89   | 89   | 78.3  |
| <i>NMB0367</i> | 387  | -2.95 | 59   | 61   | 136.0  | 18   | 21   | 46.1  |
| <i>NMB1962</i> | 279  | -2.95 | 259  | 259  | 801.2  | 89   | 89   | 271.2 |
| <i>aceF</i>    | 1608 | -2.96 | 4029 | 4029 | 2162.4 | 1380 | 1380 | 729.5 |
| <i>NMB1657</i> | 618  | -2.97 | 69   | 371  | 518.1  | 11   | 127  | 174.7 |
| <i>glnD</i>    | 2559 | -2.97 | 743  | 743  | 250.6  | 254  | 254  | 84.4  |
| <i>NMB1970</i> | 1782 | -2.98 | 675  | 675  | 326.9  | 230  | 230  | 109.7 |
| <i>NMB0827</i> | 1120 | -2.99 | 159  | 159  | 122.5  | 54   | 54   | 41.0  |
| <i>NMB1367</i> | 1065 | -2.99 | 227  | 227  | 184.0  | 77   | 77   | 61.5  |
| <i>lbpA</i>    | 2832 | -3.00 | 759  | 759  | 231.3  | 257  | 257  | 77.1  |
| <i>NMB0372</i> | 678  | -3.01 | 75   | 89   | 113.3  | 21   | 30   | 37.6  |
| <i>sbp</i>     | 1056 | -3.02 | 232  | 232  | 189.6  | 78   | 78   | 62.8  |
| <i>NMB1669</i> | 630  | -3.02 | 122  | 122  | 167.1  | 41   | 41   | 55.3  |
| <i>NMB2121</i> | 345  | -3.05 | 36   | 36   | 90.1   | 12   | 12   | 29.6  |
| <i>NMB1941</i> | 354  | -3.05 | 42   | 42   | 102.4  | 14   | 14   | 33.6  |
| <i>NMB0794</i> | 363  | -3.05 | 27   | 27   | 64.2   | 9    | 9    | 21.1  |

|                 |      |       |      |      |        |      |      |        |
|-----------------|------|-------|------|------|--------|------|------|--------|
| <i>NMB0215</i>  | 567  | -3.07 | 142  | 142  | 216.1  | 47   | 47   | 70.5   |
| <i>NMB0810</i>  | 651  | -3.07 | 245  | 245  | 324.8  | 81   | 81   | 105.8  |
| <i>hemD</i>     | 741  | -3.11 | 245  | 245  | 285.3  | 80   | 80   | 91.8   |
| <i>NMB1466</i>  | 732  | -3.11 | 138  | 138  | 162.7  | 45   | 45   | 52.3   |
| <i>nadB</i>     | 1509 | -3.13 | 441  | 441  | 252.2  | 143  | 143  | 80.6   |
| <i>NMB0256</i>  | 342  | -3.15 | 31   | 31   | 78.2   | 10   | 10   | 24.9   |
| <i>NMB2107</i>  | 765  | -3.15 | 56   | 59   | 66.6   | 19   | 19   | 21.1   |
| <i>pgmB</i>     | 666  | -3.17 | 596  | 596  | 772.3  | 191  | 191  | 243.8  |
| <i>fabF-2</i>   | 1251 | -3.18 | 316  | 316  | 218.0  | 101  | 101  | 68.6   |
| <i>NMB1274</i>  | 984  | -3.20 | 208  | 208  | 182.4  | 66   | 66   | 57.0   |
| <i>NMB1376</i>  | 2778 | -3.22 | 276  | 276  | 85.7   | 87   | 87   | 26.6   |
| <i>NMB0188</i>  | 1128 | -3.22 | 349  | 349  | 267.0  | 110  | 110  | 82.9   |
| <i>NMB0830</i>  | 1011 | -3.26 | 215  | 215  | 183.5  | 67   | 67   | 56.3   |
| <i>NMB0371</i>  | 408  | -3.26 | 122  | 122  | 258.1  | 38   | 38   | 79.2   |
| <i>NMB0753</i>  | 234  | -3.27 | 29   | 29   | 107.0  | 9    | 9    | 32.7   |
| <i>cysG-2</i>   | 1452 | -3.28 | 0    | 139  | 82.6   | 0    | 43   | 25.2   |
| <i>cysI-1</i>   | 1770 | -3.29 | 0    | 230  | 112.1  | 0    | 71   | 34.1   |
| <i>NMB2035</i>  | 693  | -3.31 | 114  | 114  | 142.0  | 35   | 35   | 42.9   |
| <i>NMB0552</i>  | 1074 | -3.33 | 285  | 285  | 229.0  | 87   | 87   | 68.9   |
| <i>cysN-1</i>   | 1287 | -3.33 | 0    | 141  | 94.6   | 0    | 43   | 28.4   |
| <i>pivNM-1A</i> | 957  | -3.35 | 0    | 76   | 68.5   | 0    | 23   | 20.4   |
| <i>NMB1830</i>  | 660  | -3.36 | 129  | 129  | 168.7  | 39   | 39   | 50.2   |
| <i>NMB1991</i>  | 975  | -3.39 | 224  | 224  | 198.3  | 67   | 67   | 58.4   |
| <i>cysG-1</i>   | 1452 | -3.43 | 0    | 179  | 106.4  | 0    | 53   | 31.0   |
| <i>nadA</i>     | 1113 | -3.45 | 306  | 306  | 237.3  | 90   | 90   | 68.7   |
| <i>NMB0792</i>  | 1416 | -3.50 | 365  | 365  | 222.5  | 106  | 106  | 63.6   |
| <i>NMB0084</i>  | 1406 | -3.52 | 461  | 461  | 283.0  | 133  | 133  | 80.4   |
| <i>NMB1721</i>  | 1410 | -3.54 | 331  | 331  | 202.6  | 95   | 95   | 57.3   |
| <i>NMB0809</i>  | 798  | -3.54 | 115  | 115  | 124.4  | 33   | 33   | 35.2   |
| <i>NMB0604</i>  | 1065 | -3.54 | 8078 | 8078 | 6546.0 | 2316 | 2316 | 1848.5 |
| <i>thiG</i>     | 789  | -3.55 | 269  | 269  | 294.2  | 77   | 77   | 83.0   |

|                 |      |       |      |      |        |     |     |       |
|-----------------|------|-------|------|------|--------|-----|-----|-------|
| <i>lgtG</i>     | 1054 | -3.56 | 291  | 291  | 238.3  | 83  | 83  | 66.9  |
| <i>NMB0035</i>  | 1167 | -3.57 | 2363 | 2363 | 1747.5 | 672 | 672 | 489.5 |
| <i>NMB0892</i>  | 423  | -3.59 | 46   | 46   | 93.9   | 13  | 13  | 26.1  |
| <i>dpnC</i>     | 804  | -3.59 | 131  | 131  | 140.6  | 37  | 37  | 39.1  |
| <i>NMB1607</i>  | 468  | -3.60 | 110  | 110  | 202.8  | 31  | 31  | 56.3  |
| <i>anmK</i>     | 1131 | -3.62 | 321  | 321  | 244.9  | 90  | 90  | 67.6  |
| <i>NMB0866</i>  | 870  | -3.63 | 204  | 204  | 202.4  | 57  | 57  | 55.7  |
| <i>NMB1740</i>  | 411  | -3.66 | 36   | 36   | 75.6   | 10  | 10  | 20.7  |
| <i>gluD</i>     | 1266 | -3.66 | 274  | 274  | 186.8  | 76  | 76  | 51.0  |
| <i>NMB0991</i>  | 1113 | -3.69 | 107  | 247  | 191.5  | 40  | 68  | 51.9  |
| <i>cytX</i>     | 1224 | -3.70 | 437  | 437  | 308.1  | 120 | 120 | 83.3  |
| <i>NMB1539</i>  | 1008 | -3.70 | 71   | 135  | 115.6  | 18  | 37  | 31.2  |
| <i>NMB0597</i>  | 354  | -3.76 | 63   | 63   | 153.6  | 17  | 17  | 40.8  |
| <i>NMB0534</i>  | 414  | -3.82 | 79   | 79   | 164.7  | 21  | 21  | 43.1  |
| <i>NMB0409</i>  | 1212 | -3.84 | 238  | 238  | 169.5  | 63  | 63  | 44.2  |
| <i>cysJ-2</i>   | 1815 | -3.90 | 0    | 165  | 78.5   | 0   | 43  | 20.1  |
| <i>NMB0374</i>  | 1404 | -3.93 | 72   | 209  | 128.5  | 25  | 54  | 32.7  |
| <i>NMB1818</i>  | 1422 | -3.93 | 519  | 519  | 315.0  | 134 | 134 | 80.1  |
| <i>NMB1780</i>  | 1743 | -3.99 | 16   | 314  | 155.5  | 4   | 80  | 39.0  |
| <i>pivNM-1B</i> | 957  | -4.02 | 0    | 99   | 89.3   | 0   | 25  | 22.2  |
| <i>NMB1786</i>  | 1155 | -4.06 | 188  | 188  | 140.5  | 47  | 47  | 34.6  |
| <i>pprC</i>     | 1155 | -4.06 | 276  | 276  | 206.2  | 69  | 69  | 50.8  |
| <i>thiE</i>     | 618  | -4.19 | 194  | 194  | 270.9  | 47  | 47  | 64.6  |
| <i>NMB0506</i>  | 1521 | -4.22 | 162  | 162  | 91.9   | 39  | 39  | 21.8  |
| <i>NMB1775</i>  | 1806 | -4.23 | 53   | 196  | 93.7   | 13  | 47  | 22.1  |
| <i>NMB1626</i>  | 1104 | -4.27 | 0    | 101  | 79.0   | 0   | 24  | 18.5  |
| <i>NMB1990</i>  | 969  | -4.33 | 239  | 239  | 212.9  | 56  | 56  | 49.1  |
| <i>NMB1523</i>  | 297  | -4.34 | 205  | 205  | 595.7  | 48  | 48  | 137.4 |
| <i>thiO</i>     | 1101 | -4.37 | 405  | 405  | 317.5  | 94  | 94  | 72.6  |
| <i>frpB</i>     | 2145 | -4.39 | 346  | 346  | 139.2  | 80  | 80  | 31.7  |
| <i>NMB0023</i>  | 408  | -4.40 | 39   | 39   | 82.5   | 9   | 9   | 18.8  |

|                |      |        |     |     |        |     |     |       |
|----------------|------|--------|-----|-----|--------|-----|-----|-------|
| <i>NMB0865</i> | 474  | -4.52  | 49  | 49  | 89.2   | 11  | 11  | 19.7  |
| <i>NMB1012</i> | 504  | -4.53  | 58  | 58  | 99.3   | 13  | 13  | 21.9  |
| <i>NMB1772</i> | 1839 | -4.57  | 107 | 108 | 50.7   | 24  | 24  | 11.1  |
| <i>NMB1879</i> | 312  | -4.65  | 55  | 55  | 152.1  | 12  | 12  | 32.7  |
| <i>prpB</i>    | 879  | -4.65  | 220 | 220 | 216.0  | 48  | 48  | 46.4  |
| <i>cstA</i>    | 2082 | -4.69  | 998 | 998 | 413.7  | 216 | 216 | 88.2  |
| <i>cysH-2</i>  | 741  | -4.70  | 0   | 37  | 43.1   | 0   | 8   | 9.2   |
| <i>NMB1400</i> | 2229 | -4.87  | 537 | 537 | 207.9  | 112 | 112 | 42.7  |
| <i>mobA</i>    | 578  | -4.87  | 96  | 96  | 143.3  | 20  | 20  | 29.4  |
| <i>NMB1015</i> | 794  | -4.91  | 58  | 58  | 63.0   | 12  | 12  | 12.8  |
| <i>accB</i>    | 456  | -4.95  | 483 | 483 | 914.1  | 99  | 99  | 184.5 |
| <i>NMB0175</i> | 810  | -5.00  | 192 | 192 | 204.6  | 39  | 39  | 40.9  |
| <i>nrdR</i>    | 465  | -5.03  | 104 | 104 | 193.0  | 21  | 21  | 38.4  |
| <i>NMB1737</i> | 1404 | -5.05  | 348 | 348 | 213.9  | 70  | 70  | 42.4  |
| <i>NMB0505</i> | 285  | -5.08  | 25  | 25  | 75.7   | 5   | 5   | 14.9  |
| <i>NMB1880</i> | 966  | -5.18  | 250 | 250 | 223.4  | 49  | 49  | 43.1  |
| <i>NMB1634</i> | 1209 | -5.18  | 245 | 245 | 174.9  | 48  | 48  | 33.7  |
| <i>NMB1054</i> | 936  | -5.19  | 101 | 133 | 122.6  | 24  | 26  | 23.6  |
| <i>NMB1878</i> | 588  | -5.34  | 142 | 142 | 208.4  | 27  | 27  | 39.0  |
| <i>NMB1092</i> | 507  | -5.37  | 74  | 74  | 126.0  | 14  | 14  | 23.5  |
| <i>NMB1738</i> | 1428 | -5.49  | 400 | 400 | 241.7  | 74  | 74  | 44.0  |
| <i>sdhC</i>    | 378  | -5.81  | 63  | 63  | 143.8  | 11  | 11  | 24.7  |
| <i>NMB1059</i> | 219  | -6.50  | 320 | 320 | 1261.0 | 50  | 50  | 194.1 |
| <i>NMB0965</i> | 273  | -6.77  | 20  | 20  | 63.2   | 3   | 3   | 9.3   |
| <i>NMB0970</i> | 1425 | -8.24  | 27  | 430 | 260.4  | 2   | 53  | 31.6  |
| <i>NMB1010</i> | 564  | -8.63  | 51  | 51  | 78.0   | 6   | 6   | 9.0   |
| <i>NMB0022</i> | 339  | -8.73  | 43  | 43  | 109.5  | 5   | 5   | 12.5  |
| <i>NMB1089</i> | 339  | -9.81  | 29  | 29  | 73.8   | 3   | 3   | 7.5   |
| <i>NMB1014</i> | 594  | -10.15 | 60  | 60  | 87.2   | 6   | 6   | 8.6   |
| <i>NMB0987</i> | 546  | -10.66 | 11  | 21  | 33.2   | 1   | 2   | 3.1   |
| <i>NMB1001</i> | 573  | -11.51 | 68  | 68  | 102.4  | 6   | 6   | 8.9   |

|                |     |        |    |    |      |   |   |     |
|----------------|-----|--------|----|----|------|---|---|-----|
| <i>NMB1087</i> | 306 | -14.72 | 29 | 29 | 81.8 | 2 | 2 | 5.6 |
|----------------|-----|--------|----|----|------|---|---|-----|

RNA was purified from bacteria that infected HBMEC (see Materials and Methods), using an Illustra RNAspin mini RNA isolation kit (GE Healthcare). The residual eukaryotic RNAs were removed by a MICROBEnrich Kit (Invitrogen). The resultant bacterial RNAs were subjected to RNA-seq by a HiSeq 2000 sequencing system with 8 million reads of total RNA, which were analyzed by Filgen, Japan. The results were analyzed by CLC Genomics Workbench with the RNA-seq expression server 5.5, referring to the NCBI\_*Neisseria meningitidis*\_MC58 database. The genes with read numbers less than 20 and with expression ratios (B/A) within the range from -1.5 to 1.5 were eliminated. Unique gene reads and total gene reads mean the number of reads that match uniquely to the gene and all of the reads that are mapped to this gene, both reads that map uniquely to the gene and reads that matched to more positions in the reference, respectively. RPKM stands for reads per kilobase of exon per million mapped sequence reads. RPKM is one of the standard measures to estimate the number of transcripts by RNA-seq, and is calculated by the following formula:  $10^9 \times (\text{number of unique gene reads}) / (\text{gene length} \times \text{number of total gene reads})$ . The genes were aligned by the ratio

of RNA from bacteria infected per not infected (shown in gray), and the genes that were highly expressed upon HBMEC infection are shown in the upper lines

B) *ΔgltT-ΔgltM* versus wild type *N. meningitidis* strains, both infected to HBMEC

| Gene name      | Annotated function                   | Gene length | Ratio (C/B) | Wild type strain (B) |                  |       | <i>ΔgltT-ΔgltM</i> mutant (C) |                  |      |
|----------------|--------------------------------------|-------------|-------------|----------------------|------------------|-------|-------------------------------|------------------|------|
|                |                                      |             |             | Unique gene reads    | Total gene reads | RPKM  | Unique gene reads             | Total gene reads | RPKM |
| <i>NMB1634</i> | phage replication initiation protein | 1209        | -9.17       | 48                   | 48               | 33.7  | 2                             | 2                | 3.7  |
| <i>NMB0970</i> | replication initiation factor        | 1425        | -5.06       | 2                    | 53               | 31.6  | 0                             | 4                | 6.2  |
| <i>NMB1772</i> | hypothetical protein                 | 1839        | -4.58       | 24                   | 24               | 11.1  | 2                             | 2                | 2.4  |
| <i>NMB0367</i> | hypothetical protein                 | 387         | -4.01       | 18                   | 21               | 46.1  | 2                             | 2                | 11.5 |
| <i>NMB1780</i> | hemolysin activation protein         | 1743        | -3.06       | 4                    | 80               | 39.0  | 0                             | 10               | 12.8 |
| <i>NMB0372</i> | hypothetical protein                 | 678         | -2.87       | 21                   | 30               | 37.6  | 2                             | 4                | 13.1 |
| <i>NMB1539</i> | IS1106 transposase                   | 1008        | -2.83       | 18                   | 37               | 31.2  | 3                             | 5                | 11.0 |
| <i>NMB1738</i> | putative secretion protein           | 1428        | -2.83       | 74                   | 74               | 44.0  | 10                            | 10               | 15.6 |
| <i>NMB0826</i> | C-5 cytosine-specific DNA methylase  | 1236        | -2.82       | 59                   | 59               | 40.6  | 8                             | 8                | 14.4 |
| <i>NMB2037</i> | hypothetical protein                 | 240         | -2.56       | 47                   | 47               | 166.5 | 7                             | 7                | 64.9 |
| <i>NMB0252</i> | hypothetical protein                 | 708         | -2.52       | 66                   | 66               | 79.2  | 10                            | 10               | 31.4 |
| <i>NMB2111</i> | MafB-related protein                 | 846         | -2.48       | 25                   | 26               | 26.1  | 4                             | 4                | 10.5 |
| <i>NMB1958</i> | putative thioredoxin                 | 501         | -2.44       | 83                   | 83               | 140.8 | 13                            | 13               | 57.7 |
| <i>NMB1737</i> | putative secretion protein           | 1404        | -2.43       | 70                   | 70               | 42.4  | 11                            | 11               | 17.4 |



|                |                                                              |      |       |     |     |       |    |    |      |
|----------------|--------------------------------------------------------------|------|-------|-----|-----|-------|----|----|------|
| <i>NMB0866</i> | hypothetical protein                                         | 870  | -2.42 | 57  | 57  | 55.7  | 9  | 9  | 23.0 |
| <i>NMB0483</i> | hypothetical protein                                         | 285  | -2.39 | 0   | 25  | 74.6  | 0  | 4  | 31.2 |
| <i>NMB1880</i> | putative ABC transporter, periplasmic solute-binding protein | 966  | -2.34 | 49  | 49  | 43.1  | 8  | 8  | 18.4 |
| <i>NMB0827</i> | type II restriction enzyme-related protein                   | 1120 | -2.29 | 54  | 54  | 41.0  | 9  | 9  | 17.9 |
| <i>NMB1657</i> | comE operon protein 1-related protein                        | 618  | -2.21 | 11  | 127 | 174.7 | 1  | 22 | 79.2 |
| <i>NMB0976</i> | TspB-related protein                                         | 396  | -2.20 | 0   | 23  | 49.4  | 0  | 4  | 22.5 |
| <i>NMB1375</i> | putative modification methylase                              | 2110 | -2.15 | 73  | 73  | 29.4  | 13 | 13 | 13.7 |
| <i>NMB0648</i> | hypothetical protein                                         | 423  | -2.10 | 66  | 66  | 132.6 | 12 | 12 | 63.1 |
| <i>NMB1020</i> | hypothetical protein                                         | 546  | -2.05 | 43  | 43  | 66.9  | 8  | 8  | 32.6 |
| <i>NMB0681</i> | hypothetical protein                                         | 225  | -2.04 | 32  | 32  | 120.9 | 6  | 6  | 59.3 |
| <i>NMB0188</i> | hypothetical protein                                         | 1128 | -2.00 | 110 | 110 | 82.9  | 21 | 21 | 41.4 |
| <i>thiO</i>    | glycine oxidase                                              | 1101 | -1.99 | 94  | 94  | 72.6  | 18 | 18 | 36.4 |
| <i>cytX</i>    | probable hydroxymethylpyrimidine transporter CytX            | 1224 | -1.99 | 120 | 120 | 83.3  | 23 | 23 | 41.8 |
| <i>NMB1400</i> | hypothetical protein                                         | 2229 | -1.94 | 112 | 112 | 42.7  | 22 | 22 | 22.0 |
| <i>mtrF</i>    | efflux pump component MtrF                                   | 1569 | -1.94 | 112 | 112 | 60.7  | 22 | 22 | 31.2 |
| <i>NMB0583</i> | IS1016C2 transposase                                         | 669  | -1.94 | 63  | 66  | 83.9  | 13 | 13 | 43.2 |
| <i>NMB1018</i> | hypothetical protein                                         | 483  | -1.91 | 30  | 30  | 52.8  | 6  | 6  | 27.6 |
| <i>frpB</i>    | iron-regulated outer membrane protein                        | 2145 | -1.91 | 80  | 80  | 31.7  | 16 | 16 | 16.6 |
| <i>NMB1224</i> | hypothetical protein                                         | 402  | -1.91 | 30  | 30  | 63.4  | 6  | 6  | 33.2 |
| <i>NMB1299</i> | pseudogene                                                   | 1367 | -1.91 | 80  | 80  | 49.7  | 16 | 16 | 26.0 |

|                |                                              |      |       |      |      |        |     |     |        |
|----------------|----------------------------------------------|------|-------|------|------|--------|-----|-----|--------|
| <i>NMB1418</i> | lipid A biosynthesis lauroyl acyltransferase | 870  | -1.89 | 94   | 94   | 91.8   | 19  | 19  | 48.6   |
| <i>NMB0121</i> | hypothetical protein                         | 378  | -1.87 | 44   | 44   | 98.9   | 9   | 9   | 53.0   |
| <i>NMB2016</i> | type IV pilin-related protein                | 450  | -1.86 | 73   | 73   | 137.9  | 15  | 15  | 74.2   |
| <i>NMB1271</i> | mercury transport periplasmic protein        | 213  | -1.85 | 29   | 29   | 115.7  | 6   | 6   | 62.7   |
| <i>NMB1303</i> | MerR family transcriptional regulator        | 408  | -1.85 | 29   | 29   | 60.4   | 6   | 6   | 32.7   |
| <i>NMB1376</i> | pseudogene                                   | 2778 | -1.85 | 87   | 87   | 26.6   | 18  | 18  | 14.4   |
| <i>prpB</i>    | 2-methylisocitrate lyase                     | 879  | -1.83 | 48   | 48   | 46.4   | 10  | 10  | 25.3   |
| <i>NMB1000</i> | pseudogene                                   | 1018 | -1.82 | 60   | 62   | 51.8   | 13  | 13  | 28.4   |
| <i>NMB0371</i> | hypothetical protein                         | 408  | -1.81 | 38   | 38   | 79.2   | 8   | 8   | 43.6   |
| <i>atpE</i>    | ATP synthase FOF1 subunit A                  | 237  | -1.81 | 360  | 360  | 1291.2 | 76  | 76  | 713.5  |
| <i>NMB0647</i> | Unknown                                      | 1239 | -1.81 | 142  | 142  | 97.4   | 30  | 30  | 53.9   |
| <i>NMB1413</i> | putative IS1016 family transposase           | 587  | -1.81 | 24   | 52   | 75.3   | 6   | 11  | 41.7   |
| <i>NMB0412</i> | cell division protein FtsL-related protein   | 270  | -1.80 | 66   | 66   | 207.8  | 14  | 14  | 115.4  |
| <i>NMB0215</i> | hypothetical protein                         | 567  | -1.80 | 47   | 47   | 70.5   | 10  | 10  | 39.2   |
| <i>NMB0498</i> | hypothetical protein                         | 510  | -1.76 | 23   | 23   | 38.3   | 5   | 5   | 21.8   |
| <i>NMB1411</i> | IS1016C2 transposase                         | 654  | -1.76 | 5    | 23   | 29.9   | 1   | 5   | 17.0   |
| <i>NMB0269</i> | competence protein                           | 726  | -1.75 | 64   | 64   | 74.9   | 14  | 14  | 42.9   |
| <i>NMB1466</i> | hypothetical protein                         | 732  | -1.72 | 45   | 45   | 52.3   | 10  | 10  | 30.4   |
| <i>NMB2137</i> | Unknown                                      | 213  | -1.69 | 1659 | 1659 | 6620.6 | 374 | 374 | 3907.0 |
| <i>prcC</i>    | anticodon nuclease                           | 1143 | -1.69 | 53   | 53   | 39.4   | 12  | 12  | 23.4   |

|                |                                       |      |       |     |     |       |     |     |       |
|----------------|---------------------------------------|------|-------|-----|-----|-------|-----|-----|-------|
| <i>NMB1227</i> | hypothetical protein                  | 396  | -1.68 | 22  | 22  | 47.2  | 5   | 5   | 28.1  |
| <i>NMB2035</i> | hypothetical protein                  | 693  | -1.67 | 35  | 35  | 42.9  | 8   | 8   | 25.7  |
| <i>NMB0350</i> | hypothetical protein                  | 453  | -1.66 | 26  | 26  | 48.8  | 6   | 6   | 29.5  |
| <i>NMB0175</i> | zinc transporter                      | 810  | -1.66 | 39  | 39  | 40.9  | 9   | 9   | 24.7  |
| <i>nadA</i>    | quinolinate synthetase                | 1113 | -1.64 | 90  | 90  | 68.7  | 21  | 21  | 42.0  |
| <i>NMB1851</i> | hypothetical protein                  | 261  | -1.64 | 30  | 30  | 97.7  | 7   | 7   | 59.7  |
| <i>thiG</i>    | thiazole synthase                     | 789  | -1.63 | 77  | 77  | 83.0  | 18  | 18  | 50.8  |
| <i>NMB1775</i> | hypothetical protein                  | 1806 | -1.63 | 13  | 47  | 22.1  | 4   | 11  | 13.6  |
| <i>NMB1407</i> | pseudogene                            | 1130 | -1.63 | 98  | 98  | 73.7  | 23  | 23  | 45.3  |
| <i>NMB1548</i> | TspB protein                          | 1647 | -1.61 | 61  | 118 | 60.9  | 13  | 28  | 37.8  |
| <i>NMB1991</i> | iron(III) ABC transporter permease    | 975  | -1.60 | 67  | 67  | 58.4  | 16  | 16  | 36.5  |
| <i>cysD-1</i>  | sulfate adenylyltransferase subunit 2 | 924  | -1.60 | 0   | 46  | 42.3  | 0   | 11  | 26.5  |
| <i>NMB2043</i> | pseudogene                            | 972  | -1.59 | 21  | 25  | 21.9  | 3   | 6   | 13.7  |
| <i>NMB1159</i> | hypothetical protein                  | 891  | -1.58 | 0   | 87  | 83.0  | 0   | 21  | 52.4  |
| <i>NMB1959</i> | hypothetical protein                  | 384  | -1.58 | 128 | 128 | 283.3 | 31  | 31  | 179.6 |
| <i>NMB1405</i> | FrpA/C-like protein                   | 1203 | -1.58 | 402 | 454 | 320.8 | 101 | 110 | 203.5 |
| <i>NMB0809</i> | hypothetical protein                  | 798  | -1.58 | 33  | 33  | 35.2  | 8   | 8   | 22.3  |
| <i>NMB0521</i> | hypothetical protein                  | 459  | -1.57 | 37  | 37  | 68.5  | 9   | 9   | 43.6  |
| <i>anmK</i>    | anhydro-N-acetylmuramic acid kinase   | 1131 | -1.56 | 90  | 90  | 67.6  | 22  | 22  | 43.3  |
| <i>NMB0584</i> | FrpC operon protein                   | 816  | -1.56 | 52  | 94  | 97.9  | 13  | 23  | 62.7  |

|                |                                               |      |       |      |      |        |     |     |        |
|----------------|-----------------------------------------------|------|-------|------|------|--------|-----|-----|--------|
| <i>NMB0120</i> | hypothetical protein                          | 552  | -1.56 | 49   | 49   | 75.5   | 12  | 12  | 48.4   |
| <i>NMB1647</i> | amino acid symporter                          | 1419 | -1.56 | 554  | 554  | 331.9  | 136 | 136 | 213.3  |
| <i>dedA</i>    | DedA membrane-associated protein              | 645  | -1.55 | 73   | 73   | 96.2   | 18  | 18  | 62.1   |
| <i>NMB0316</i> | hypothetical protein                          | 687  | -1.55 | 81   | 81   | 100.2  | 20  | 20  | 64.8   |
| <i>fabF-2</i>  | 3-oxoacyl-ACP synthase                        | 1251 | -1.54 | 101  | 101  | 68.6   | 25  | 25  | 44.5   |
| <i>NMB1883</i> | hypothetical protein                          | 291  | -1.53 | 32   | 32   | 93.5   | 8   | 8   | 61.2   |
| <i>NMB1346</i> | pseudogene                                    | 1778 | -1.52 | 127  | 127  | 60.7   | 32  | 32  | 40.0   |
| <i>NMB0830</i> | hypothetical protein                          | 1011 | -1.51 | 67   | 67   | 56.3   | 17  | 17  | 37.4   |
| <i>NMB1993</i> | iron(III) ABC transporter ATP-binding protein | 759  | -1.51 | 67   | 67   | 75.0   | 17  | 17  | 49.8   |
| <i>NMB0409</i> | hypothetical protein                          | 1212 | -1.50 | 63   | 63   | 44.2   | 16  | 16  | 29.4   |
| <i>rpsH</i>    | 30S ribosomal protein S8                      | 393  | -1.50 | 937  | 937  | 2026.7 | 238 | 238 | 1347.5 |
| <i>NMB2015</i> | hypothetical protein                          | 270  | 1.37  | 23   | 23   | 72.4   | 12  | 12  | 98.9   |
| <i>NMB0197</i> | Unknown                                       | 288  | 1.37  | 111  | 111  | 327.6  | 58  | 58  | 448.1  |
| <i>nrdR</i>    | transcriptional regulator                     | 465  | 1.37  | 21   | 21   | 38.4   | 11  | 11  | 52.6   |
| <i>NMB1474</i> | 4-oxalocrotonate tautomerase                  | 210  | 1.37  | 40   | 40   | 161.9  | 21  | 21  | 222.5  |
| <i>NMB0996</i> | hypothetical protein                          | 372  | 1.37  | 80   | 80   | 182.8  | 42  | 42  | 251.2  |
| <i>ssb</i>     | ssDNA-binding protein                         | 525  | 1.38  | 451  | 451  | 730.2  | 237 | 237 | 1004.5 |
| <i>cysK</i>    | cysteine synthase                             | 933  | 1.38  | 1214 | 1214 | 1106.0 | 639 | 639 | 1523.9 |
| <i>NMB1899</i> | hypothetical protein                          | 444  | 1.38  | 93   | 93   | 178.0  | 49  | 49  | 245.6  |
| <i>NMB2021</i> | aminopeptidase                                | 267  | 1.38  | 237  | 237  | 754.5  | 125 | 125 | 1041.7 |

|                |                                       |      |      |      |      |        |      |      |        |
|----------------|---------------------------------------|------|------|------|------|--------|------|------|--------|
| <i>NMB1428</i> | aminopeptidase                        | 1797 | 1.38 | 654  | 654  | 309.4  | 346  | 346  | 428.4  |
| <i>NMB1176</i> | hypothetical protein                  | 402  | 1.39 | 0    | 49   | 103.6  | 0    | 26   | 143.9  |
| <i>NMB1713</i> | IS30 family transposase               | 966  | 1.52 | 0    | 38   | 33.4   | 0    | 22   | 50.7   |
| <i>NMB0266</i> | hypothetical protein                  | 327  | 1.52 | 181  | 181  | 470.5  | 105  | 105  | 714.5  |
| <i>NMB1368</i> | ATP-dependent RNA helicase            | 1389 | 1.53 | 3514 | 3514 | 2150.5 | 2056 | 2056 | 3293.6 |
| <i>fnt</i>     | methionyl-tRNA formyltransferase      | 927  | 1.53 | 369  | 369  | 338.4  | 216  | 216  | 518.5  |
| <i>gloA</i>    | lactoylglutathione lyase              | 417  | 1.54 | 440  | 440  | 896.9  | 259  | 259  | 1382.0 |
| <i>pgmB</i>    | beta-phosphoglucomutase               | 666  | 1.55 | 191  | 191  | 243.8  | 113  | 113  | 377.5  |
| <i>metK</i>    | S-adenosylmethionine synthetase       | 1170 | 1.55 | 319  | 319  | 231.8  | 189  | 189  | 359.4  |
| <i>NMB0606</i> | hypothetical protein                  | 267  | 1.56 | 230  | 230  | 732.2  | 137  | 137  | 1141.7 |
| <i>NMB0947</i> | dihydrolipoamide dehydrogenase        | 1404 | 1.56 | 967  | 967  | 585.5  | 577  | 577  | 914.4  |
| <i>NMB1871</i> | hypothetical protein                  | 678  | 1.58 | 93   | 93   | 116.6  | 56   | 56   | 183.8  |
| <i>NMB1727</i> | hypothetical protein                  | 429  | 1.58 | 144  | 144  | 285.3  | 87   | 87   | 451.2  |
| <i>NMB1858</i> | hypothetical protein                  | 387  | 1.59 | 204  | 204  | 448.1  | 124  | 124  | 713.0  |
| <i>NMB1607</i> | sigma-54 dependent response regulator | 468  | 1.60 | 31   | 31   | 56.3   | 19   | 19   | 90.3   |
| <i>NMB1490</i> | Unknown                               | 432  | 1.61 | 1237 | 1237 | 2434.0 | 761  | 761  | 3919.7 |
| <i>def</i>     | peptide deformylase                   | 504  | 1.62 | 392  | 392  | 661.1  | 243  | 243  | 1072.8 |
| <i>NMB1906</i> | hypothetical protein                  | 222  | 1.68 | 25   | 25   | 95.7   | 16   | 16   | 160.4  |
| <i>NMB2002</i> | hypothetical protein                  | 219  | 1.68 | 187  | 187  | 725.8  | 120  | 120  | 1219.2 |
| <i>kat</i>     | catalase                              | 1515 | 1.68 | 976  | 976  | 547.6  | 627  | 627  | 920.9  |

|                |                                                                |      |         |      |      |        |     |     |        |
|----------------|----------------------------------------------------------------|------|---------|------|------|--------|-----|-----|--------|
| <i>aceF</i>    | pyruvate dehydrogenase E2 component                            | 1608 | 1.69    | 1380 | 1380 | 729.5  | 890 | 890 | 1231.6 |
| <i>gcvH</i>    | glycine cleavage system protein H                              | 387  | 1.69    | 492  | 492  | 1080.7 | 318 | 318 | 1828.4 |
| <i>NMB1590</i> | hypothetical protein                                           | 336  | 1.71    | 278  | 278  | 703.3  | 182 | 182 | 1205.3 |
| <i>NMB1336</i> | hypothetical protein                                           | 549  | 1.73    | 215  | 215  | 332.9  | 142 | 142 | 575.5  |
| <i>accB</i>    | acetyl-CoA carboxylase biotin carboxyl carrier protein subunit | 456  | 1.80    | 99   | 99   | 184.5  | 68  | 68  | 331.8  |
| <i>NMB0087</i> | hypothetical protein                                           | 198  | 1.91    | 26   | 26   | 111.6  | 19  | 19  | 213.5  |
| <i>NMB0459</i> | hypothetical protein                                           | 1110 | 3.76    | 0    | 23   | 17.6   | 0   | 33  | 66.2   |
| <i>gltM</i>    | L-glutamate ABC transporter component GltM                     | 495  | #DIV/0! | 110  | 110  | 188.9  | 0   | 0   | 0.0    |
| <i>gltT</i>    | L-glutamate ABC transporter GltT                               | 777  | #DIV/0! | 428  | 428  | 468.2  | 0   | 0   | 0.0    |

The results were analyzed by CLC Genomics Workbench with the RNA-seq expression server 5.5, referring to the NCBI\_Neisseria meningitidis\_MC58 database. The genes with read numbers less than 20 and expression ratios (C/B) within the range from -1.5 to 1.5 were eliminated. Unique gene reads and total gene reads mean the number of reads that match uniquely to the gene and all of the reads that are mapped to this gene, both reads that map uniquely to the gene and reads that matched to more positions in the reference, respectively. RPKM stands for reads per kilobase of exon per million mapped sequence reads. RPKM is one of the standard methods to

estimate the number of transcripts by RNA-seq, and is calculated by the following formula:  $10^9 \times (\text{number of unique gene reads}) / (\text{gene length} \times \text{number of total gene reads})$ . The genes were aligned by the ratio of RNA from  $\Delta gltT$ - $\Delta gltM$  mutant per wild type *N. meningitidis* strain (shown in gray columns), and the genes that were highly expressed in the  $\Delta gltT$ - $\Delta gltM$  mutant are shown in the upper columns. The genes with clearly known functions are shown with the gene name, and not as an annotated number in the table.
