# Supplementary material
Source: PubMed Central journal article supplement (PMC4534661)
Supplement: IAI.00654-15_zii999091370so2.pdf [file IAI.00654-15_zii999091370so2.pdf]

Supplemental Table 2. Proteome analysis in *N. meningitidis* infected to HBMEC

| Accession No. | Description                                                                                                         | Exp.1       |         | Exp.2       |         | Exp.3       |         |
|---------------|---------------------------------------------------------------------------------------------------------------------|-------------|---------|-------------|---------|-------------|---------|
|               |                                                                                                                     | Mutant / WT | Average | Mutant / WT | Average | Mutant / WT | Average |
| 15676484      | copper ABC transporter ATP-binding protein [ <i>Neisseria meningitidis</i> MC58]                                    | 0.738       | 1.169   | 1.761       | 1.473   | /           | /       |
| 15676734      | cold-shock domain-contain protein [ <i>Neisseria meningitidis</i> MC58]                                             | 0.370       | 0.586   | 0.589       | 0.493   | /           | /       |
| 15677308      | hypothetical protein NMB1452 [ <i>Neisseria meningitidis</i> MC58]                                                  | 0.821       | 1.301   | 1.680       | 1.406   | 0.665       | 1.397   |
| 161353785     | riboflavin synthase subunit alpha [ <i>Neisseria meningitidis</i> MC58]                                             | /           | /       | 0.759       | 0.635   | 0.348       | 0.731   |
| 218767155     | 30S ribosomal protein S14 [ <i>Neisseria meningitidis</i> Z2491]                                                    | 0.765       | 1.213   | /           | /       | 0.627       | 1.318   |
| 254672983     | putative exported protein [ <i>Neisseria meningitidis</i> alpha275]                                                 | 0.340       | 0.538   | 0.700       | 0.586   | 0.224       | 0.472   |
| 254673507     | 3-isopropylmalate dehydratase, small subunit [ <i>Neisseria meningitidis</i> $\alpha$ 275]                          | 0.414       | 0.656   | 0.586       | 0.49    | 0.278       | 0.585   |
| 254674245     | putative thioredoxin [ <i>Neisseria meningitidis</i> alpha275]                                                      | 0.341       | 0.540   | /           | /       | 0.341       | 0.540   |
| 316985219     | hypothetical protein NMH_1017 [ <i>Neisseria meningitidis</i> H44/76]                                               | 1.195       | 1.894   | 2.939       | 2.459   | 1.045       | 2.196   |
| 254671740     | thioredoxin [ <i>Neisseria meningitidis</i> alpha153]                                                               |             |         | 0.507       | 0.424   | 0.193       | 0.406   |
| 254672281     | outer membrane lipoprotein carrier protein LolA [ <i>Neisseria meningitidis</i> $\alpha$ 275]                       | /           | /       | 0.715       | 0.598   | 0.337       | 0.707   |
| 254673840     | ADP-ribose pyrophosphatase [ <i>Neisseria meningitidis</i> $\alpha$ 275]                                            | /           | /       | 0.612       | 0.512   | 0.271       | 0.569   |
| 254674279     | 5-methyltetrahydropteroyltriglutamate--homocysteine methyltransferase [ <i>Neisseria meningitidis</i> $\alpha$ 275] | /           | /       | 0.391       | 0.327   | 0.319       | 0.669   |
| 296061833     | ABC transporter, periplasmic substrate-binding protein [ <i>Neisseria</i>                                           | /           | /       | 0.702       | 0.587   | 0.351       | 0.783   |

|           |                                                                                              |       |       |       |       |       |       |
|-----------|----------------------------------------------------------------------------------------------|-------|-------|-------|-------|-------|-------|
|           | <i>meningitidis</i> ]                                                                        |       |       |       |       |       |       |
| 316985219 | hypothetical protein NMH_1017 [ <i>Neisseria meningitidis</i> H44/76]                        | 1.195 | 1.894 | 2.939 | 2.459 | 1.045 | 2.196 |
| 352289494 | CtrB [ <i>Neisseria meningitidis</i> ]                                                       | 1.032 | 1.636 | 1.715 | 1.435 | 0.954 | 2.006 |
| 385852822 | antibiotic biosynthesis monooxygenase family protein [ <i>Neisseria meningitidis</i> H44/76] | 0.410 | 0.649 | 0.504 | 0.422 | 0.281 | 0.591 |
| 385853257 | hypothetical protein NMBH4476_1113 [ <i>Neisseria meningitidis</i> H44/76]                   | 0.411 | 0.651 | 0.695 | 0.582 |       |       |
| 385853541 | DNA polymerase III subunit delta' [ <i>Neisseria meningitidis</i> H44/76]                    | 0.887 | 1.406 |       |       | 0.607 | 1.276 |
| 385854001 | 50S ribosomal protein L31 [ <i>Neisseria meningitidis</i> H44/76]                            | 0.381 | 0.604 | 0.542 | 0.453 |       |       |
| 385854176 | hypothetical protein NMBH4476_2082 [ <i>Neisseria meningitidis</i> H44/76]                   | 0.377 | 0.597 | 0.606 | 0.507 | 0.130 | 0.274 |
| 389606666 | hypothetical protein NMALPHA522_2037 [ <i>Neisseria meningitidis</i> $\alpha$ 522]           | 0.781 | 1.237 | 1.892 | 1.583 |       |       |
| 488143866 | adhesin [ <i>Neisseria meningitidis</i> ]                                                    | 0.360 | 0.571 | 0.639 | 0.535 | 0.268 | 0.562 |
| 488148010 | hypothetical protein [ <i>Neisseria meningitidis</i> ]                                       | 0.376 | 0.596 |       |       | 0.269 | 0.566 |
| 488149008 | glyceraldehyde-3-phosphate dehydrogenase [ <i>Neisseria meningitidis</i> ]                   | 0.802 | 1.271 | 2.135 | 1.786 | 0.617 | 1.297 |
| 488162207 | 50S ribosomal protein L3 [ <i>Neisseria meningitidis</i> ]                                   | 0.391 | 0.62  | 0.769 | 0.644 | 0.684 | 1.438 |
| 488164052 | ATP-dependent DNA helicase HrpA [ <i>Neisseria meningitidis</i> ]                            | 0.764 | 1.211 | 1.774 | 1.484 |       |       |
| 488165487 | beta-phosphoglucomutase [ <i>Neisseria meningitidis</i> ]                                    | 0.341 | 0.54  |       |       | 0.345 | 0.726 |
| 488169334 | hypothetical protein [ <i>Neisseria meningitidis</i> ]                                       | 0.786 | 1.246 |       |       | 0.732 | 1.538 |
| 488177979 | neisseria PilC beta-propeller domain protein [ <i>Neisseria meningitidis</i> ]               | 0.410 | 0.65  |       |       | 0.347 | 0.729 |
| 488188694 | hypothetical protein [ <i>Neisseria meningitidis</i> ]                                       | 0.758 | 1.201 | 1.642 | 1.374 |       |       |
| 498490231 | putative 3-deoxy-manno-octulosonate cytidyltransferase [ <i>Neisseria</i>                    | 0.843 | 1.336 | 1.772 | 1.483 | #     | #     |

|           |                                                                                                                 |       |       |       |       |       |       |
|-----------|-----------------------------------------------------------------------------------------------------------------|-------|-------|-------|-------|-------|-------|
|           | <i>meningitidis</i> ]                                                                                           |       |       |       |       |       |       |
| 500123036 | endo-1,4-D-glucanase [ <i>Neisseria meningitidis</i> ]                                                          | 0.371 | 0.588 | 0.519 | 0.435 | 0.294 | 0.618 |
| 501178742 | N5-glutamine S-adenosyl-L-methionine-dependent methyltransferase<br>[ <i>Neisseria meningitidis</i> ]           | 0.821 | 1.302 | 1.686 | 1.411 | 0.772 | 1.623 |
| 501178803 | glutamate racemase [ <i>Neisseria meningitidis</i> ]                                                            | 0.781 | 1.238 | 1.971 | 1.649 |       |       |
| 515768390 | hypothetical protein [ <i>Neisseria meningitidis</i> ]                                                          | 0.211 | 0.334 | 0.681 | 0.57  | 0.177 | 0.371 |
| 545064626 | acyl-CoA dehydrogenase, N-terminal domain protein [ <i>Neisseria meningitidis</i> ]                             | 0.353 | 0.559 |       |       | 0.318 | 0.667 |
| 316985685 | ribosomal L18p/L5e family protein [ <i>Neisseria meningitidis</i> H44/76]                                       |       |       | 0.646 | 1.357 | 1.513 | 1.266 |
| 332639892 | Chain A, The Crystal Structure Of Thioredoxin-Related Protein From<br><i>Neisseria meningitidis</i> Serogroup B |       |       | 0.633 | 0.53  | 0.217 | 0.456 |
| 374074225 | Chain D, Fic Protein From <i>Neisseria meningitidis</i> Mutant Delta8 In Complex<br>With AMP-PNP                |       |       | 0.720 | 0.602 | 0.325 | 0.684 |
| 385852525 | 2,3,4,5-tetrahydropyridine-2,6-dicarboxylate N-succinyltransferase [ <i>Neisseria meningitidis</i> H44/76]      |       |       | 0.746 | 0.624 | 0.333 | 0.701 |
| 385852535 | hypothetical protein NMBH4476_0340 [ <i>Neisseria meningitidis</i> H44/76]                                      |       |       | 0.589 | 0.439 | 0.333 | 0.701 |
| 385852828 | cytosol aminopeptidase [ <i>Neisseria meningitidis</i> H44/76]                                                  |       |       | 0.758 | 0.634 | 0.342 | 0.719 |
| 385852892 | ribonuclease PH [ <i>Neisseria meningitidis</i> H44/76]                                                         |       |       | 0.668 | 0.559 | 0.354 | 0.744 |
| 385852936 | hypothetical protein NMBH4476_0776 [ <i>Neisseria meningitidis</i> H44/76]                                      |       |       | 0.738 | 0.617 | 0.299 | 0.628 |
| 385852989 | glucose-6-phosphate isomerase [ <i>Neisseria meningitidis</i> H44/76]                                           |       |       | 1.693 | 1.416 | 0.317 | 0.666 |
| 385853537 | glutaredoxin [ <i>Neisseria meningitidis</i> H44/76]                                                            |       |       | 0.444 | 0.372 | 0.326 | 0.686 |

|           |                                                                                                                      |  |  |       |       |              |       |
|-----------|----------------------------------------------------------------------------------------------------------------------|--|--|-------|-------|--------------|-------|
| 385853547 | cysteine synthase A [ <i>Neisseria meningitidis</i> H44/76]                                                          |  |  | 0.808 | 0.676 | <b>0.355</b> | 0.747 |
| 385853647 | endoribonuclease L-PSP [ <i>Neisseria meningitidis</i> H44/76]                                                       |  |  | 0.804 | 0.672 | 0.334        | 0.702 |
| 385853669 | inorganic pyrophosphatase [ <i>Neisseria meningitidis</i> H44/76]                                                    |  |  | 0.618 | 0.517 | 0.352        | 0.74  |
| 385853871 | shikimate kinase [ <i>Neisseria meningitidis</i> H44/76]                                                             |  |  | 0.739 | 0.618 | 0.290        | 0.609 |
| 385854073 | 3-demethylubiquinone-9 3-methyltransferase [ <i>Neisseria meningitidis</i> H44/76]                                   |  |  | 0.710 | 0.594 | 0.254        | 0.534 |
| 488147722 | hypothetical protein, partial [ <i>Neisseria meningitidis</i> ]                                                      |  |  | 0.682 | 0.571 | 0.332        | 0.674 |
| 488152897 | 3-ketoacyl-ACP reductase [ <i>Neisseria meningitidis</i> ]                                                           |  |  | 0.745 | 0.624 | 0.346        | 0.702 |
| 488155421 | aromatic amino acid aminotransferase [ <i>Neisseria meningitidis</i> ]                                               |  |  | 0.783 | 0.655 | 0.297        | 0.624 |
| 488155967 | phosphoglycolate phosphatase, bacterial, partial [ <i>Neisseria meningitidis</i> ]                                   |  |  | 0.672 | 0.562 | 0.280        | 0.589 |
| 488164122 | ABC transporter substrate-binding protein [ <i>Neisseria meningitidis</i> ]                                          |  |  | 0.749 | 0.627 | 0.277        | 0.582 |
| 488181049 | glyceraldehyde-3-phosphate dehydrogenase, type I [ <i>Neisseria meningitidis</i> ]                                   |  |  | 0.688 | 0.576 | 0.276        | 0.579 |
| 488186253 | hypothetical protein, partial [ <i>Neisseria meningitidis</i> ]                                                      |  |  | 0.710 | 0.594 | 0.266        | 0.56  |
| 488190078 | 3-deoxy-D-manno-octulosonate 8-phosphate phosphatase, YrbI family protein, partial [ <i>Neisseria meningitidis</i> ] |  |  | 0.727 | 0.608 | 0.281        | 0.591 |
| 504393427 | ATP-dependent metalloprotease [ <i>Neisseria meningitidis</i> ]                                                      |  |  | 1.668 | 1.396 | 0.608        | 1.278 |

Protein samples were prepared as follows: bacteria infected to HBMEC (see Materials and Methods) were suspended in 70  $\mu$ l of 100 mM  $\text{Na}_2\text{B}_4\text{O}_7$  (pH 7.5). Ten  $\mu$ l of 20 mM Tris (2-chloroethyl)phosphate (TCEP) and 10  $\mu$ l of 10% SDS were added, and then the

bacterial suspension was incubated at 95 °C for 30 min. The sample was lightly sonicated for 5 sec and centrifuged at 16,000 x g at 4 °C for 5 min. The resultant supernatant (~100 µl) was mixed with 900 µl of 100 mM Na<sub>2</sub>B<sub>4</sub>O<sub>7</sub> (pH 7.5), and the protein concentration was determined with a BCA Protein Assay Kit (Thermo), with bovine serum albumin as the standard. A solution corresponding to 100 µg of protein was mixed with triethylammonium bicarbonate (TEAB) and TCEP, at final concentrations of 45 mM and 10 mM, respectively. The solution was incubated at 55 °C for 1 hr and then cooled to room temperature. A 15 µl aliquot of 375 mM iodoacetoamide was added to the solution, which was incubated at room temperature for 30 min under dark conditions. The protein was precipitated with chilled acetone. The pellet was dried, suspended in 100 µl of 100 mM TEAB, and digested with trypsin at 37 °C overnight. The resultant protein samples were labeled with a TMTduplex Isobaric Mass Tagging Kit (Thermo), according to the manufacturer's protocol. The samples were subjected to an LC-MS/MS analysis. The results were analyzed by Proteome Discovery (Ver. 1.4) with the MASCOT search engine (Ver. 2.4.1), referring to the NCBI\_Neisseria meningitidis (entry number: 453988), NCBI\_Neisseria meningitidis\_H44/76

(entry number: 6401) and NCBI\_Neisseria meningitidis\_MC58 (entry number: 4914) databases. The referring databases for the results are shown in the Table with square brackets. The cut-offs for the false discovery rate and the peptide rank for all analyzed data were  $<5\%$  and 1, respectively. Since the protein expression ratios in the 3 independent experiments varied, the ratio value was divided by the average in each assay for normalization (shown in gray columns). Proteins with expression ratios of mutant (M) per wild type (W) strains (M/W) between 1.25 and 0.75 were eliminated, and proteins found in 2 out of 3 total independent experiments were chosen as reproducible results and shown in the table.
