# Supplementary material
Source: PubMed Central journal article supplement (PMC4534661)

1 Supplemental figure (A) Western blots for the detection of the PilE (left) and PilV  
2 (right) proteins in whole cell extracts of *N. meningitidis*, incubated in AM for 4 hours.  
3 Bacterial extracts equivalent to OD<sub>600</sub> values of 0.0025 for PilE and 0.01 for PilV were  
4 analyzed by western blotting. Lane 1, HT1125; lane 2, HT1414 ( $\Delta$ *gltT*- $\Delta$ *gltM*::*ermC*).  
5 The *pilE*::*ermC* strain HT1156 (lane 3 for PilE) and the  $\Delta$ *pilV*::*ermC* strain HT1688  
6 (lane 3 for PilV) were used as the negative controls for the anti-PilE and anti-PilV  
7 antisera, respectively (42). Black arrows indicate the PilE and PilV proteins, and gray  
8 arrows indicate non-specific bands used as internal controls. (B) Aggregation formation  
9 evaluated by phase-contrast microscopy, after a 4 hour incubation in AM. Aggregates  
10 observed in the wild type (Left) and  $\Delta$ *gltT*- $\Delta$ *gltM* (Right) *N. meningitidis* strains,  
11 respectively.

**A**

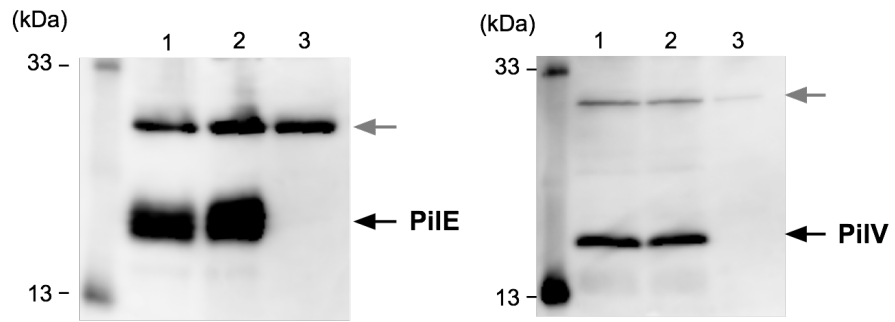

**B**

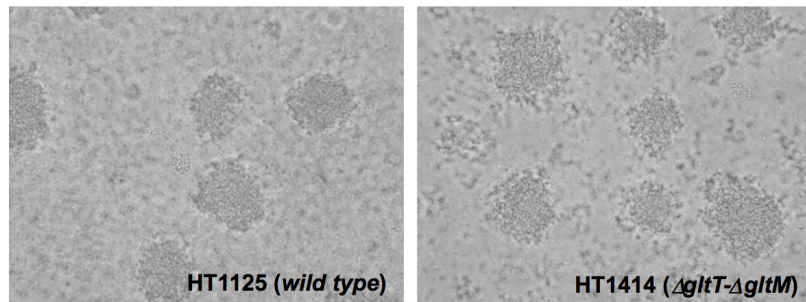

Supplement: IAI.00654-15_zii999091370so3.pdf [file IAI.00654-15_zii999091370so3.pdf]
